# Supplementary material for: Modeling Eastern Russian High Arctic Geese (Anser fabalis, A. albifrons) during moult and brood rearing with Machine Learning, Open Access GIS and 24 years-long Big Data: Good Evidence for the New Digital Arctic of 2021
Source: Research Square preprint supplement (doi:10.21203/rs.3.rs-637037/v1), 2021-07-07
Supplement: Supplementary file 1 [file 718c92f20d7faecaabf09b13.docx]

**APPENDICES**

Appendix I Bird Data with ISO-compliant metadata

GIS shapefiles of tables 1a and 1b

Appendix II Six GIS Data layers with details and ISO-compliant metadata

Data layer details and GIS layers (Note: a large tiff file zip archive is currently available from FH due to size restrictions with the journal archive site; contact authors for details)

Appendix III List of Survey Location names (following anglicized local names; survey coordinates presented in appendix I)

Appendix IV Model Data: GIS Surface overlays and predictions

Appendix V Model Data: Model details
