# Supplementary material for: Modeling Eastern Russian High Arctic Geese (Anser fabalis, A. albifrons) during moult and brood rearing with Machine Learning, Open Access GIS and 24 years-long Big Data: Good Evidence for the New Digital Arctic of 2021
Source: Research Square preprint supplement (doi:10.21203/rs.3.rs-637037/v1), 2021-07-07

Appendix V Model Data: Model details

(See also table 2 for model predictor ranks)

*Anser fabalis* brood: top predictor 1-dimensional


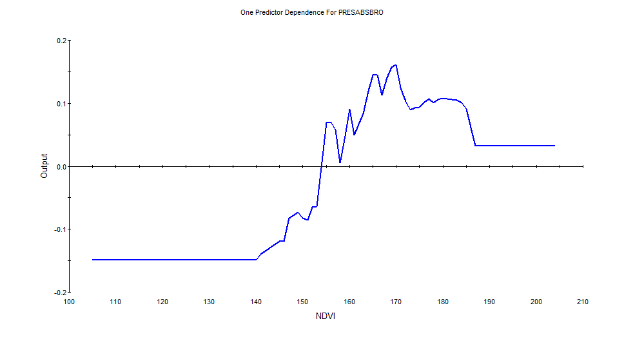


*Anser fabalis* brood: top predictor 2-dimensional


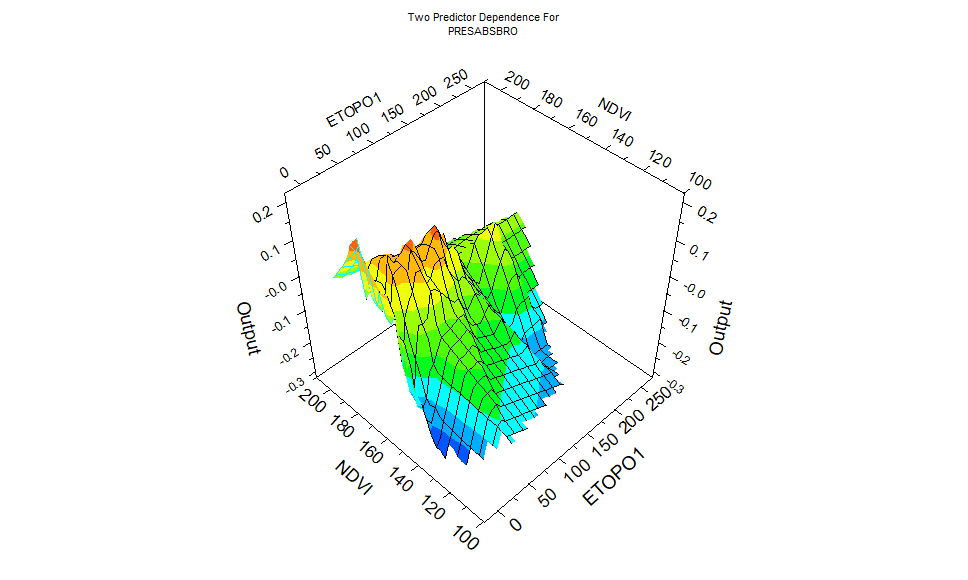


*Anser fabalis* non-breeder : top predictor 1-dimensional


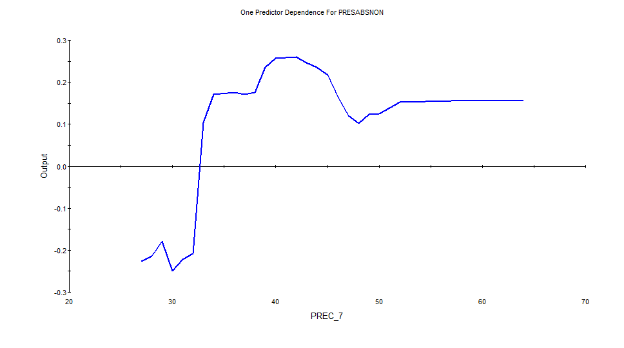


*Anser fabalis* non-breeder: top predictor 2-dimensional

*
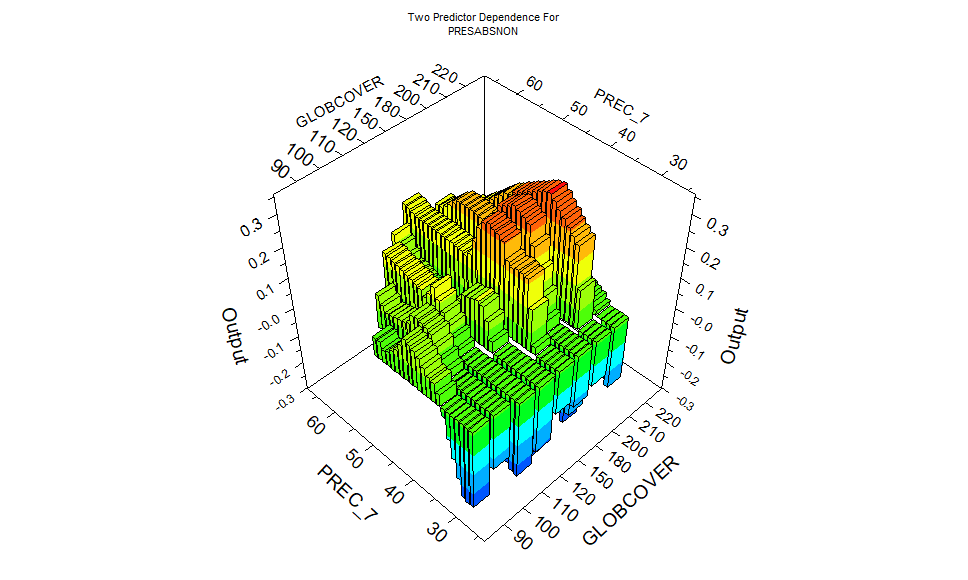
*

*Anser albifrons* brood: top predictor 1-dimensional


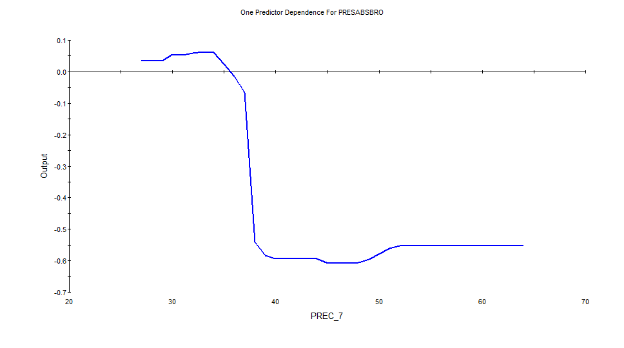


*Anser albifrons* brood: top predictor 2-dimensional


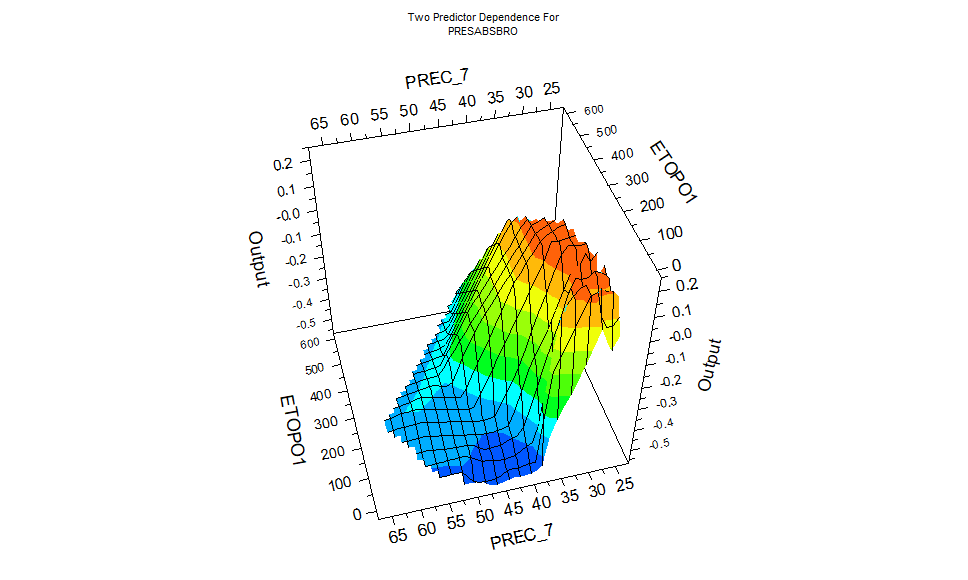


*Anser albifrons* non-breeder : top predictor 1-dimensional


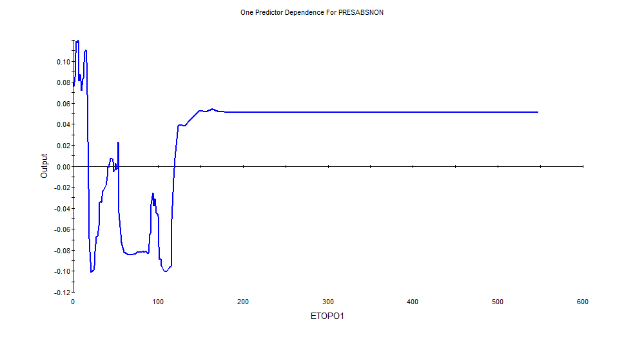


*Anser albifrons* non-breeder: top predictor 2-dimensional


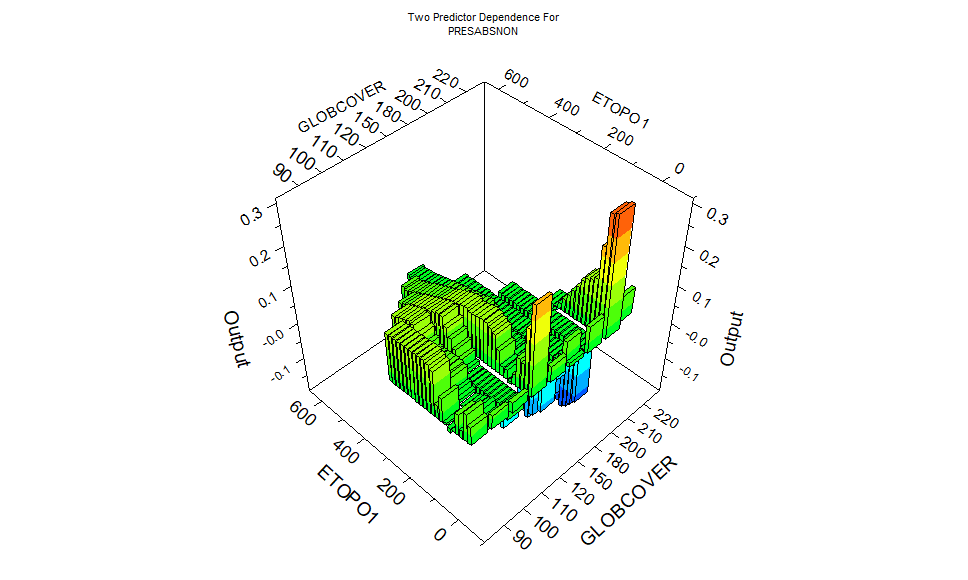

Supplement: Supplementary file 3 [file ee544f891be28ce65dc48903.docx]
